# Supplementary material
Source: PubMed Central journal article supplement (PMC7837033)
Supplement: mmc1.pdf [file mmc1.pdf]

# THE LANCET

## Neurology

### Supplementary appendix

This appendix formed part of the original submission. We post it as supplied by the authors.

Supplement to: Muppidi S, Guptill JT, Jacob S, et al. COVID-19-associated risks and effects in myasthenia gravis (CARE-MG). *Lancet Neurol* 2020; **19**: 970–71.

## **Supplementary Material**

### **Content**

1. Title, Authors, Affiliations (pages 1-2)
2. Author Disclosures (pages 3-6)
3. CARE-MG registry details (pages 7-9)
4. Table 1 with current CARE-MG (pages 10-12)
5. Author appendix with study group, steering committee and investigators (pages 13-14)
6. Case reports by Country (page 15)

## **COVID-19 Associated Risks and Effects in Myasthenia Gravis (CARE-MG): Development of an International Physician Registry and Initial Data**

### Authors:

Srikanth Muppidi<sup>1\*</sup>, Jeffrey T. Guptill<sup>2\*</sup>, Saiju Jacob<sup>3</sup>, Yingkai Li<sup>2</sup>, Maria E. Farrugia<sup>4</sup>, Amanda C. Guidon<sup>5</sup>, Jinny O. Tavee<sup>6</sup>, Henry Kaminski<sup>7</sup>, James F. Howard Jr<sup>8</sup>, Gary Cutter<sup>9</sup>, Heinz Wiendl<sup>10</sup>, Matthew B. Maas<sup>6</sup>, Isabel Illa<sup>11</sup>, Renato Mantegazza<sup>12</sup>, Hiroyuki Murai<sup>13</sup>, Kimiaki Utsugisawa<sup>14</sup>, Richard J. Nowak<sup>15</sup>, and the CARE-MG Study Group<sup>^</sup>.

### Affiliations:

<sup>1</sup> Department of Neurology, Stanford Medical Center, Stanford, CA

<sup>2</sup> Duke University School of Medicine, Durham, NC

<sup>3</sup> Department of Neurology and Institute of Immunology and Immunotherapy, University Hospitals, Birmingham, B15 2TH, UK.

<sup>4</sup> Neurology Department, Institute of Neurological Sciences, Glasgow, UK

<sup>5</sup> Department of Neurology, Massachusetts General Hospital, Harvard Medical School, Boston, MA

<sup>6</sup> Department of Neurology, Northwestern University, Chicago, IL

<sup>7</sup> Department of Neurology, The George Washington University, Washington, DC

<sup>8</sup> Department of Neurology, University of North Carolina, Chapel Hill, NC

<sup>9</sup> Department of Biostatistics, University of Alabama at Birmingham, AL

<sup>10</sup> Department of Neurology with Institute of Translational Neurology, University of Münster, Germany

<sup>11</sup>Department of Neurology, Hospital de la Santa Creu I Sant Pau, C/Pare Claret 167, Barcelona, Spain

<sup>12</sup> Fondazione IRCCS Istituto Neurologico Carlo Besta: Milano, lombardia, IT

<sup>13</sup> International University of Health and Welfare, Narita, Japan

<sup>14</sup> Hanamaki General Hospital, Hanamaki, Iwate, Japan

<sup>15</sup>Yale University School of Medicine

\* Authors contributed equally

^Complete CARE-MG Study Group list provided in supplement page # 14

**Role of funding source:** We are very grateful to the Myasthenia Gravis Foundation of America for supporting the CARE-MG website and providing financial support for the IRB submission. MGFA did not have any role in study design, data collection, data analysis or interpretation or writing the report.

**Author Contributions:**

Authors SM, JTG and RJK helped with design of the study protocol and manuscript preparation.

All other authors helped with design of study protocol and important suggestions to manuscript.

All authors have full access to data and accept responsibility and accept responsibility for the decision to submit for publication. Authors SM and YL verify the underlying data in table 1.

This study is approved by central IRB and additional local IRBs as required.

**Author Disclosures:**

Muppidi S: Dr Muppidi reports no conflicts directly related to this publication. Dr. Muppidi reports other from Alexion, other from argenx, other from Ra Pharma, outside the submitted work; .

Guptill J: Dr. Guptill reports no conflicts directly related to this publication. Dr. Guptill reports personal fees for advisory boards from Immunovant, Alexion, Cabaletta, Regeneron, Argenx, and Momenta, and grants from Ra Pharma, outside the submitted work.

Jacob S: Dr Jacob has served as an international advisory board member for Alexion, Alnylam and Regeneron pharmaceuticals, is currently an expert panel member of Myasthenia Gravis consortium for Argenx pharmaceuticals, has worked as chief/principle investigator for Myasthenia trials conducted by Alexion, ArgenX, Momenta, UCB pharmaceuticals and has received speaker fees from Terumo BCT and Eisai pharmaceuticals.

Li Y: Dr. Li reports no conflicts directly related to this publication.

Farrugia ME: Dr. Dr. Farrugia has nothing to disclose.

Guidon AC: Dr. Guidon has received research support from the Myasthenia Gravis Foundation of America and MGNET; Clinical trial funding and consultant fees or honoraria from Momenta, Ra Pharma and Alexion; publishing Royalties from Oakstone Publishing.

Tivee J: Dr. Tivee reports no conflicts directly related to this publication.

Kaminski H: Dr. Kaminski reports no conflicts directly related to this publication.

Howard JF Jr: Dr. Howard reports no conflicts directly related to this publication. Dr Howard has received research support from Alexion Pharmaceuticals, argenx BVBA, the Centers for Disease Control and Prevention (Atlanta, GA, USA), the Muscular Dystrophy Association, the National Institutes of Health (including the National Institute of Neurological Disorders and

Stroke and the National Institute of Arthritis and Musculoskeletal and Skin Diseases), PCORI, Ra Pharmaceuticals, Honoraria from Alexion Pharmaceuticals, argenx BVBA, Ra Pharmaceuticals, Regeneron Pharmaceuticals and Viela Bio Inc. and non-financial support from Alexion Pharmaceuticals, argenx BVBA, Ra Pharmaceuticals and Toleranzia.

Cutter G: Dr. Cutter reports personal fees from MedDay, during the conduct of the study; personal fees for data safety monitoring boards from: Astra Zeneca, Avexis Pharmaceuticals, Biolinerx, Brainstorm Cell Therapeutics, Bristol Myers Squibb/Celgene, CSL Behring, Galmed Pharmaceuticals, Horizon Pharmaceuticals, Hisun Pharmaceuticals, Mapi Pharmaceuticals, Merck, Merck/Pfizer, Opko Biologics, Neurim, Novartis, Ophazyme, Sanofi-Aventis, Reata Pharmaceuticals, Teva Pharmaceuticals, Viela Bio, Vivus, NHLBI, NICHD; personal fees for consulting or advisory board from: Biogen, Click Therapeutics, Genzyme, Genentech, GW Pharmaceuticals, Klein-Buendel Incorporated, Medimmune, Novartis, Osmotica Pharmaceuticals, Perception Neurosciences, Recursion/Cerexis Pharmaceuticals, Roche, Somahlution, and TG Therapeutics; and personal fees from Pythagoras, Inc, outside the submitted work.

Wiendl H: H. Dr. Wiendl reports grants and personal fees from Abbvie, Biogen, Merck Serono, Sanofi-Genzyme, personal fees from Evgen, MedDay Pharmaceuticals, from Novartis, Roche Pharma AG, Immunic, Alexion, Actelion, F. Hoffmann-La Roche Ltd., Gemeinnützige Hertie-Stiftung, Lundbeck, TEVA, WebMD Global, grants from German Ministry for Education and Research (BMBF), Deutsche Forschungsgesellschaft (DFG), Else Kröner Fresenius Foundation, European Union, Fresenius Foundation, Hertie Foundation, NRW Ministry of Education and Research, Interdisciplinary Center for Clinical Studies (IZKF)

Muenster, RE Children's Foundation, PML Consortium, g Swiss MS Society, GlaxoSmithKline GmbH outside the submitted work.

Maas M: Dr. Maas reports no conflicts directly related to this publication. He receives grant funding from the National Institutes of Health and the Agency for Healthcare Research and Quality.

Illa I: Dr. Illa reports no conflicts directly related to this publication.

Mantegazza R: Dr. Mantegazza reports no conflicts directly related to this publication. He has received funding for Travel or Meeting attendance from , Alexion, Argenx, Biogen, Novartis, Catalyst, Merck Serono, UCB and for Advisory Board participation from Alexion, Argenx, UCB, Regeneron.

Murai H: Dr. Murai reports personal fees from Alexion Pharmaceuticals, personal fees from argenx BVBA, personal fees from Ra Pharmaceuticals, personal fees from UCB Pharma, grants from Japan Blood Products Organization, grants from Ministry of Health, Labour and Welfare, Japan, outside the submitted work; .

Utsugisawa K: Dr. Utsugisawa reports no conflicts directly related to this publication. He has served as a paid consultant for argenx, Ra Pharmaceuticals, UCB Pharma and Viela Bio and has received speaker honoraria from the Japan Blood Products Organization and Alexion Pharmaceuticals.

Nowak RJ: Dr. Nowak reports no conflicts directly related to this publication. Dr. Nowak has received research support from Alexion Pharmaceuticals, argenx, Genentech, Grifols, Immunovant, Momenta, the Myasthenia Gravis Foundation of America, the National Institutes of Health (National Institute of Neurological Disorders and Stroke and National Institute of Allergy

and Infectious Diseases), and Ra Pharma; and consultancy fees from Alexion Pharmaceuticals, argenx, CSL Behring, Grifols, Immunovant, Momenta, Ra Pharma, Roivant, and Viela Bio.

Funding: Myasthenia Gravis Foundation of America (MGFA)



## **CARE-MG Registry Details**

We request that physicians report patients with Autoimmune Myasthenia gravis who developed COVID-19 irrespective of severity.

### **Inclusion Criteria:**

1. MG diagnosis (as per antibody criteria or electrodiagnostic criteria or response to acetylcholine esterase inhibitor therapy)
2. COVID-19 diagnosis both laboratory-confirmed or clinically suspected
  - Laboratory Confirmed COVID-19 - Positive viral RNA tests or positive serology for SARS-CoV-2
  - Suspected COVID-19 but not confirmed - Fever with Dry cough, +/- anorexia, myalgias, dyspnea, anosmia/ageusia, potential exposure, Chest imaging suggestive of COVID-19

### **Critical elements requested in registry:**

1. MG clinical characteristics including MG antibody status, thymectomy or thymoma status, preceding immunosuppression, and MGFA status.
2. Details related to COVID-19 diagnosis including diagnostic testing, severity, validated measures of sepsis or respiratory status, and any treatment given for COVID-19
3. MG worsening/crises with COVID-19 and any MG-specific treatment given for worsening and crises.
4. Overall outcomes during or soon after COVID-19 diagnosis including death.

**Research Study Approval:**

This study was reviewed by the Advarra central institutional review board (IRB) and was given ‘exempt’ status as per U.S Department of Health and Human Services regulations found at 45 CFR (code of federal regulations) 46.104(d)(4). Further information on Advarra can be obtained at <https://www.advarra.com/about-advarra/the-advarra-review-board/> (accessed on September 3, 2020).

We recommend physicians to follow local regulations regarding research study protocol and submitting de-identified information. Registry is specifically designed to avoid any identifying information and minimize or eliminate the burden on reporting physicians or faculty.

**Case Report Forms:**

The registry remains open and active accrual continues through electronic or paper case report form submission.

Case submission can be completed at <https://myasthenia.org/For-Professionals/Resources-for-Professionals/CARE-MG>).

**Data Storage:**

All submitted data electronically (by REDCap) or paper form is stored at Duke Clinical and Translational Science Institute.

**CARE-MG Registry commitment and goals:**

CARE-MG registry represents the commitment of neurologists and neuromuscular specialists from across the globe to collect key information necessary to ensure evidence-based practices for our patients with MG in a dynamic public health environment. We encourage clinicians to report all their COVID-19 MG cases irrespective of outcomes and to join the CARE-MG Study Group.

Only with robust international collaboration can we ensure our data represent the true experience of patients with MG and address critical unanswered questions related to the pandemic.

Responsive real-world data updates will be made available as cases continue to be reported by the neurology community.

**Table 1:****Table 1: Demographic and Disease Characteristics of Patients with Myasthenia Gravis Diagnosed with Coronavirus Disease 2019 in the CARE-MG Registry, as of October 5th, 2020**

|                                              |                     |
|----------------------------------------------|---------------------|
| <b>Cohort Characteristics</b>                |                     |
| No. of patients with MG                      | 91(100%)            |
| <b>Demographics</b>                          |                     |
| Age, mean (SD), yrs                          | 56.24 ( $\pm$ 16.1) |
| Age >65 years, n (%)                         | 30 (32%)            |
| Women, n (%)                                 | 49 (53%)            |
| Men, n (%)                                   | 42 (47%)            |
| <b>Antibody Status</b>                       |                     |
| AChR+, n (%)                                 | 72 (79%)            |
| MuSK+, n (%)                                 | 7 (8%)              |
| Seronegative or Unknown, n (%)               | 12 (13%)            |
| <b>Clinical Phenotype</b>                    |                     |
| Ocular, n (%)                                | 9 (10%)             |
| Generalized, n (%)                           | 82 (90%)            |
| <b>MGFA Clinical Class prior to COVID-19</b> |                     |
| Asymptomatic, n (%)                          | 21 (23%)            |
| I, n (%)                                     | 16 (17%)            |
| IIa/IIb, n (%)                               | 35 (38%)            |
| IIIa/IIIb, n (%)                             | 11 (12%)            |
| IVa/IVb, n (%)                               | 5 (6%)              |
| V, n (%)                                     | 1 (1%)              |
| Unknown, n (%)                               | 2 (2%)              |
| <b>MG Therapy prior to COVID-19</b>          |                     |

|                                           |          |
|-------------------------------------------|----------|
| Immunosuppressive therapy, n (%)          | 81 (89%) |
| Symptomatic or no therapy, n (%)          | 10 (11%) |
| <b>Co-morbid conditions</b>               |          |
| Cardiovascular disease                    | 11 (12%) |
| Pulmonary disease                         | 10 (11%) |
| HTN                                       | 23 (25%) |
| Diabetes                                  | 24 (26%) |
| Obesity (BMI>30)                          | 11 (12%) |
| Former or current smoker                  | 14 (15%) |
| <b>COVID-19 Diagnosis</b>                 |          |
| Laboratory confirmed, n (%)               | 80 (88%) |
| Clinically suspected, n (%)               | 11 (12%) |
| <b>COVID-19 Clinical Course</b>           |          |
| Hospitalization required, n (%)           | 63 (69%) |
| Outpatient management, n (%)              | 28 (31%) |
| <b>COVID-19 specific treatments</b>       |          |
| Remdesivir                                | 4 (4%)   |
| Hydroxychloroquine                        | 16 (18%) |
| Azithromycin                              | 16 (18%) |
| Tocilizumab                               | 3 (3%)   |
| Oseltamivir                               | 4 (4%)   |
| Lopinavir                                 | 4 (4%)   |
| Tocilizumab                               | 3 (3%)   |
| Corticosteroids                           | 11 (12%) |
| <b>MG Clinical Course during COVID-19</b> |          |
| No. with MG exacerbation/crisis           | 36 (40%) |

|                                                                           |          |
|---------------------------------------------------------------------------|----------|
| <b>Worst MGFA Clinical Class during or immediately following COVID-19</b> |          |
| Asymptomatic, n (%)                                                       | 14 (15%) |
| I, n (%)                                                                  | 11(12%)  |
| IIa/IIb, n (%)                                                            | 30 (33%) |
| IIIa/IIIb, n (%)                                                          | 15 (16%) |
| IVa/IVb, n (%)                                                            | 11 (12%) |
| V, n (%)                                                                  | 4 (4%)   |
| Unknown, n (%)                                                            | 6 (7%)   |
| <b>Treatment for MG exacerbation/crisis</b>                               | 36 (40%) |
| PLEX                                                                      | 4 (4%)   |
| IVIg                                                                      | 16 (18%) |
| Corticosteroids                                                           | 18 (20%) |
| Other (change in pyridostigmine dose)                                     | 2 (2%)   |
| <b>Clinical Outcome</b>                                                   |          |
| Death                                                                     | 22 (24%) |
| Recovered/Discharged Home                                                 | 39 (43%) |
| Recovering/Unknown                                                        | 30 (33%) |

## Author Appendix: CARE-MG Study Group

### Steering Committee

Srikanth Muppidi\* (Stanford University, USA)

Saiju Jacob\* (University Hospitals Birmingham NHS Foundation Trust, UK)

Jeffrey T. Guptill\* (Duke University, USA)

Henry Kaminski\* (George Washington University, USA)

James F. Howard Jr\* (University of North Carolina, USA)

Gary Cutter (University of Alabama, USA)

Heinz Wiendl\* (University of Münster, Germany)

Richard J. Nowak\* (Yale University, USA)

Steering committee members actively participated in the development of study protocol and design of case reporting form and formulate overall goals of the registry. We hope to expand the study group in future to improve the gender balance and have more international representation in future as we expand the study.

All clinicians who report cases are automatically included in the investigator group and we hope to acknowledge the effort by researchers.

### Investigators (listed alphabetically)

| First name, middle initial | Last name  |
|----------------------------|------------|
| Amanda C Guidon*           | Guidon*    |
| Alok                       | Tyagi      |
| Ana Paula                  | Sousa      |
| Anthony A                  | Amato      |
| Ashwin                     | Pinto      |
| Bhaskar                    | Roy        |
| Caroline                   | Carmichael |
| Dubravka                   | Dodig      |
| Georgina                   | Burke      |
| Gary R                     | Cutter     |
| Henry J                    | Kaminski*  |
| Heinz                      | Wiendl*    |

|                 |            |
|-----------------|------------|
| Hiroyuki        | Murai      |
| Ikjae           | Lee        |
| Isabel          | Illa       |
| Jeffrey         | Guptill*   |
| James F.        | Howard Jr* |
| James           | Caress     |
| Jane            | Pritchard  |
| Jinny O         | Tavee      |
| John            | Vissing    |
| Kamla           | Best       |
| Kimiaki         | Utsugisawa |
| Mahtab          | Ramezani   |
| Mathew          | Maas       |
| Maria E         | Farrugia   |
| Michael K       | Hehir      |
| Michelle        | Kaku       |
| Natalia Jiménez | Esquivel   |
| Paul            | Gallagher  |
| Paul            | Maddison   |
| Philip A        | Ambrose    |
| Renato E        | Mantegazza |
| Richard J       | Nowak*     |
| Rocio Vazquez   | Do Campo   |
| Saiju           | Jacob*     |
| Sami            | Saba       |
| Shahriar        | Nafissi    |
| Shannon         | Itoyama    |
| Srikanth        | Muppidi*   |
| Stuart Viegas   | Viegas     |
| Victoria        | Marshall   |
| Yingkai Li      | Li         |

**\*Member of the International MG/COVID-19 Working Group**



**Cases reported from different countries (alphabetically)- as of Oct 5<sup>st</sup>, 2020**

| <b>Country</b>           | <b>91 (100%)</b> |
|--------------------------|------------------|
| Canada                   | 1(1%)            |
| Iran                     | 22(24%)          |
| Israel                   | 1(1%)            |
| Italy                    | 3(3%)            |
| Japan                    | 1(1%)            |
| Portugal                 | 1(1%)            |
| Spain                    | 1(1%)            |
| Trinidad and Tobago      | 1(1%)            |
| United Kingdom           | 33(36%)          |
| United States of America | 28(31%)          |
